# Supplementary material
Source: PubMed Central journal article supplement (PMC4940195)
Supplement: NIHMS799381-supplement-supplement_1.pdf [file NIHMS799381-supplement-supplement_1.pdf]

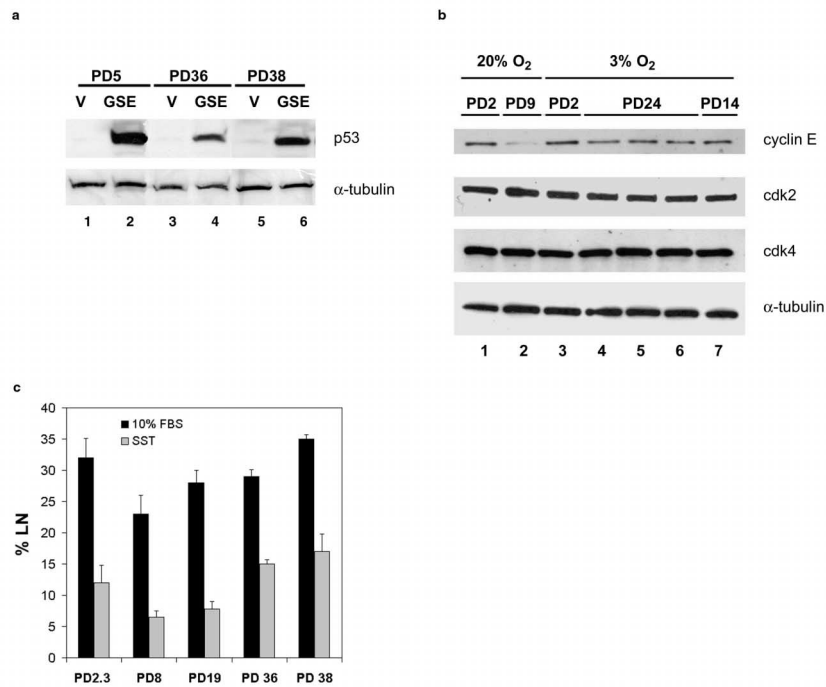

**Figure S1. Efficacy of GSE, levels of G<sub>1</sub> cyclin-dependent kinases, and responsiveness to serum deprivation of MEFs cultured in 3% O<sub>2</sub>.** **a**, An early passage (PD5) and two late passage (PD36 and PD38) C57Bl/6 MEF cultures grown in 3% O<sub>2</sub> were infected with insertless (lanes 1, 3, 5) or GSE-expressing (lanes 2, 4, 6) pBABE-puro retroviruses. Proteins were prepared and assayed for p53 and  $\alpha$ -tubulin (control) by western blotting. **b**, Proteins were prepared from C57Bl/6 MEFs proliferating in 20% (lanes 1, 2) or 3% (lanes 3-7) O<sub>2</sub>, and analyzed

by western blotting for cyclin E, Cdk2, Cdk4 and  $\alpha$ -tubulin. Early passage (PD 2, lane 1) and senescent (PD 9, lane 2) cultures in 20% O<sub>2</sub>, and early (PD 2, lane 3), mid- (PD 14, lane 7), and three independent later (PD 24, lanes 3-6) passage 3% O<sub>2</sub> cultures were analyzed. **c**, Five MEF cultures were grown for the indicated PDs in 3% O<sub>2</sub>. The cells were shifted to 10% (10% FBS; black bars) or 0.5% (SST; gray bars) serum for 3 d before <sup>3</sup>H-thymidine was added for 1 h. The fraction of cells synthesizing DNA was determined from the %LN.

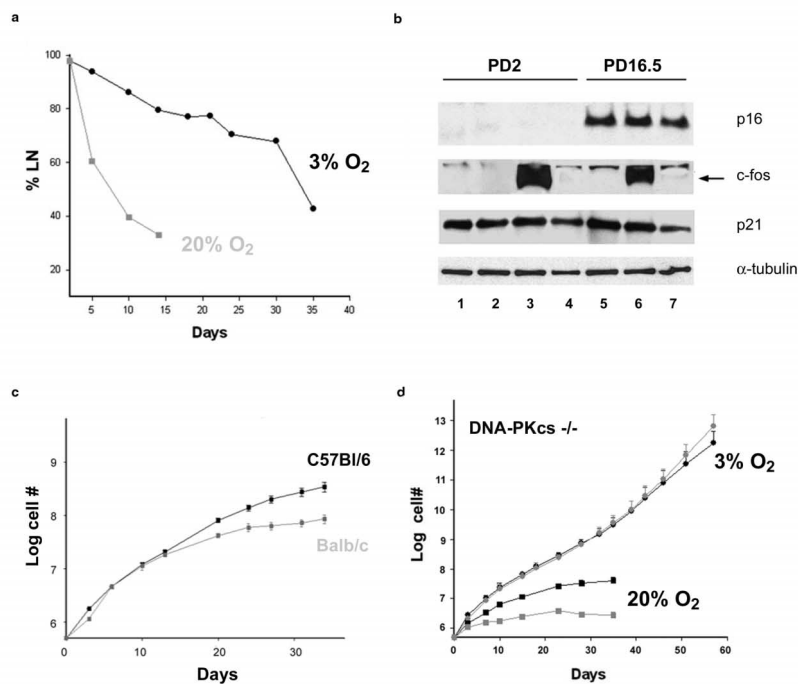

**Figure S2. Senescence of Balb/c and DNA-PKcs<sup>-/-</sup> MEFs in low oxygen.** **a**, The labeling index (% LN) was determined at every passage for representative Balb/c cultures grown in 20% (gray) or 3% (black) O<sub>2</sub>. **b**, Early passage (PD 2, lanes 1-4) and senescent (PD 16.5, lanes 5-7) Balb/c MEF cultures grown in 3% O<sub>2</sub> were analyzed for C-FOS, p16, p21 and  $\alpha$ -tubulin by western blotting. Proteins were prepared from exponentially growing (lane 1) and serum-deprived (lanes 2 and 5)

cultures, or cultures that were serum deprived and then serum-stimulated for 1.5 h. (lanes 3, 6) or 6 h (lanes 4, 7). **c**, The lifespan of three C57Bl/6 (black) and three Balb/c (gray) MEFcultures, derived and grown in 20% O<sub>2</sub>, was determined. **d**, The replicative life span of DNA-PKcs<sup>-/-</sup> MEFs in 3% or 20% O<sub>2</sub> is shown. Four DNA-PKcs (gray) and three wild-type littermate (black) cultures were derived and grown in 3% or 20% O<sub>2</sub>.

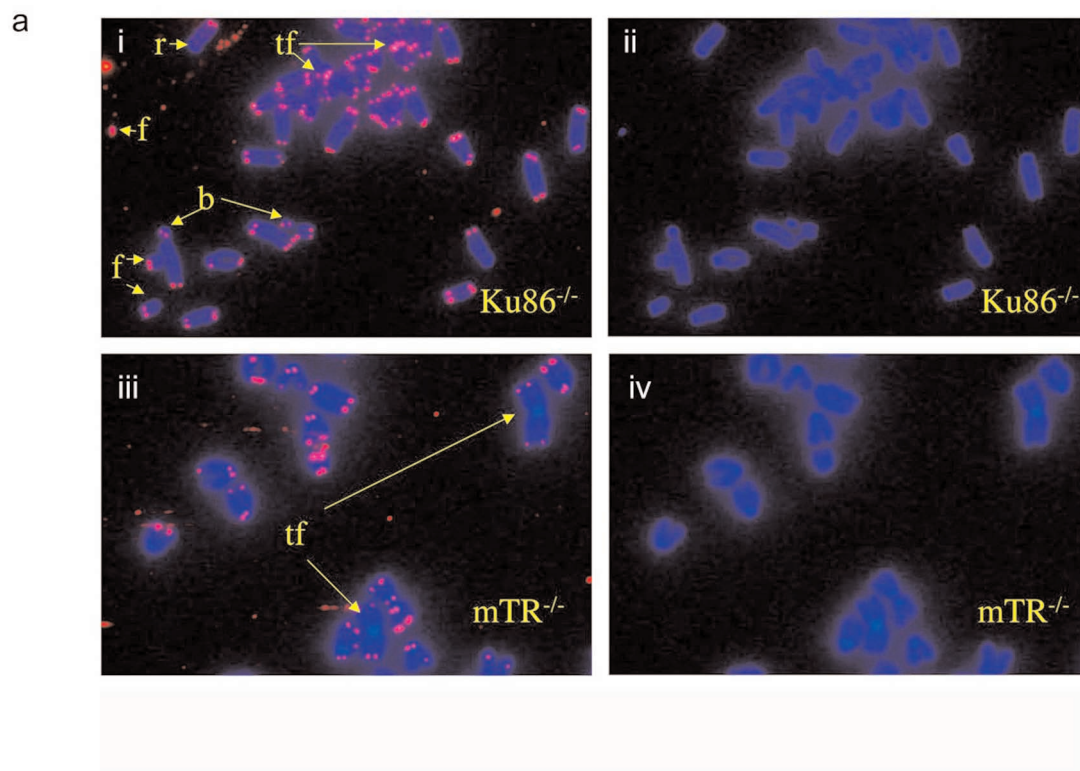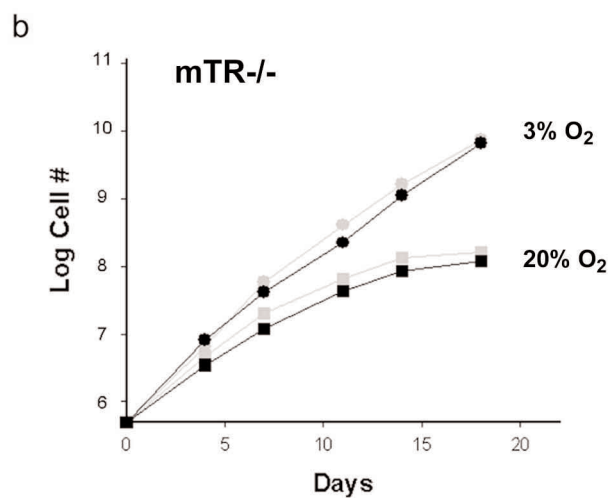

Figure S3. **Telomere-FISH and growth of telomerase-deficient MEFs in 3% and 20% O<sub>2</sub>.** **a**, Representative metaphase spreads of early passage *ku80*<sup>-/-</sup> and fourth generation *mTR*<sup>-/-</sup> MEFs before (ii and iv) and after (i and iii) fluorescence *in situ* hybridization (FISH) with a telomere probe. Arrows denote breaks (b),

fragments (f), rings (r) and telomeric fusions (tf). **b**, Replicative life spans of a representative fourth generation *mTR*<sup>-/-</sup> (gray) and wild-type littermate (black) MEF culture in 3% O<sub>2</sub> (circles) and 20% (squares) O<sub>2</sub> are shown. Duplicate cultures were grown in parallel. Similar results were obtained with an independent *mTR*<sup>-/-</sup> MEF culture.
